# Supplementary material for: Synthesis of zirconium( iv ) and hafnium( iv ) isopropoxide, sec -butoxide and tert -butoxide
Source: Royal Society of Chemistry journal article supplement (doi:10.1039/d4dt01280a), 2024-01-01
Supplement: d4dt01280a1.pdf [file d4dt01280a1.pdf]

**Supporting Information:**

**Synthesis of Zirconium(IV) and Hafnium(IV)  
isopropoxide, sec-butoxide, and tert-butoxide**

Evert Dhaene, Carlotta Seno, and Jonathan De Roo\*

*Department of Chemistry, University of Basel, Mattenstrasse 22, 4058 Basel, Switzerland*

E-mail: Jonathan.DeRoo@unibas.ch

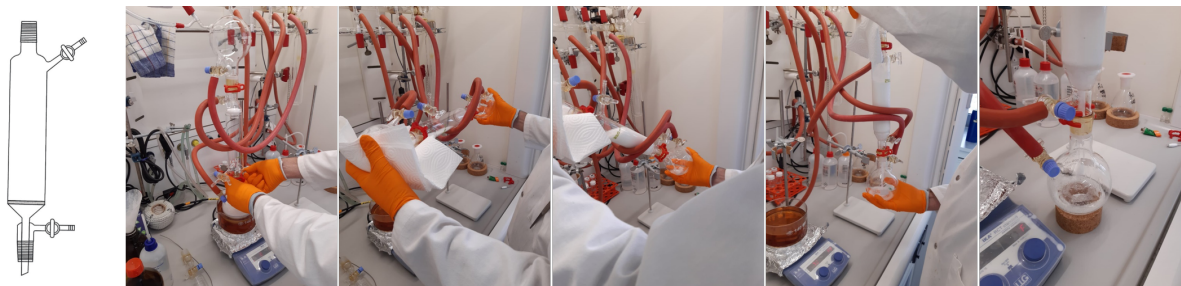

**Figure S1:** Schematic diagram of the reversible glass frit and pictures of the air- and moisture-free Schlenk filtration.

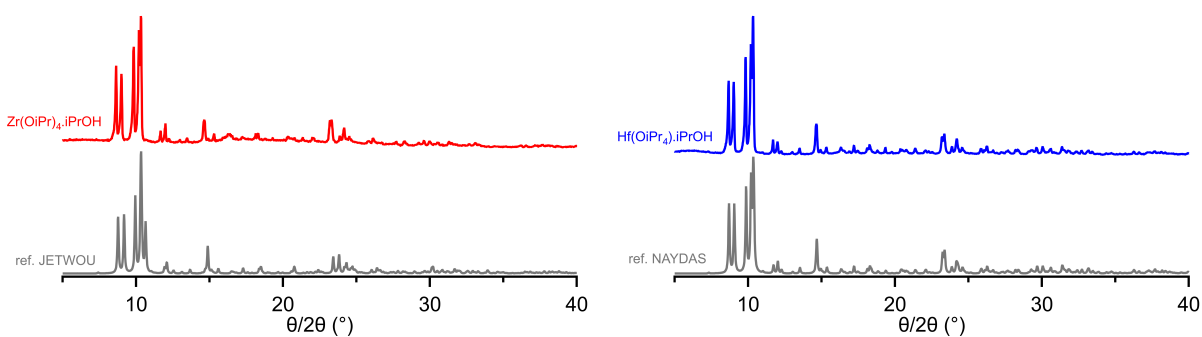

**Figure S2:** Powder XRD of (left) the synthesized  $\text{Zr}(\text{O}i\text{Pr})_4 \cdot i\text{PrOH}$  and the calculated powder diffraction pattern from the CSD reference JETWOU, and (right) the synthesized  $\text{Hf}(\text{O}i\text{Pr})_4 \cdot i\text{PrOH}$  and the calculated powder diffraction pattern from the CSD reference NAYDAS.
